# Supplementary material for: Beating the news using social media: the case study of American Idol
Source: Springer Nature journal article supplement (doi:10.1140/epjds8), 2012-07-31
Supplement: 13688_2012_8_MOESM7_ESM.pdf [file 13688_2012_8_MOESM7_ESM.pdf]

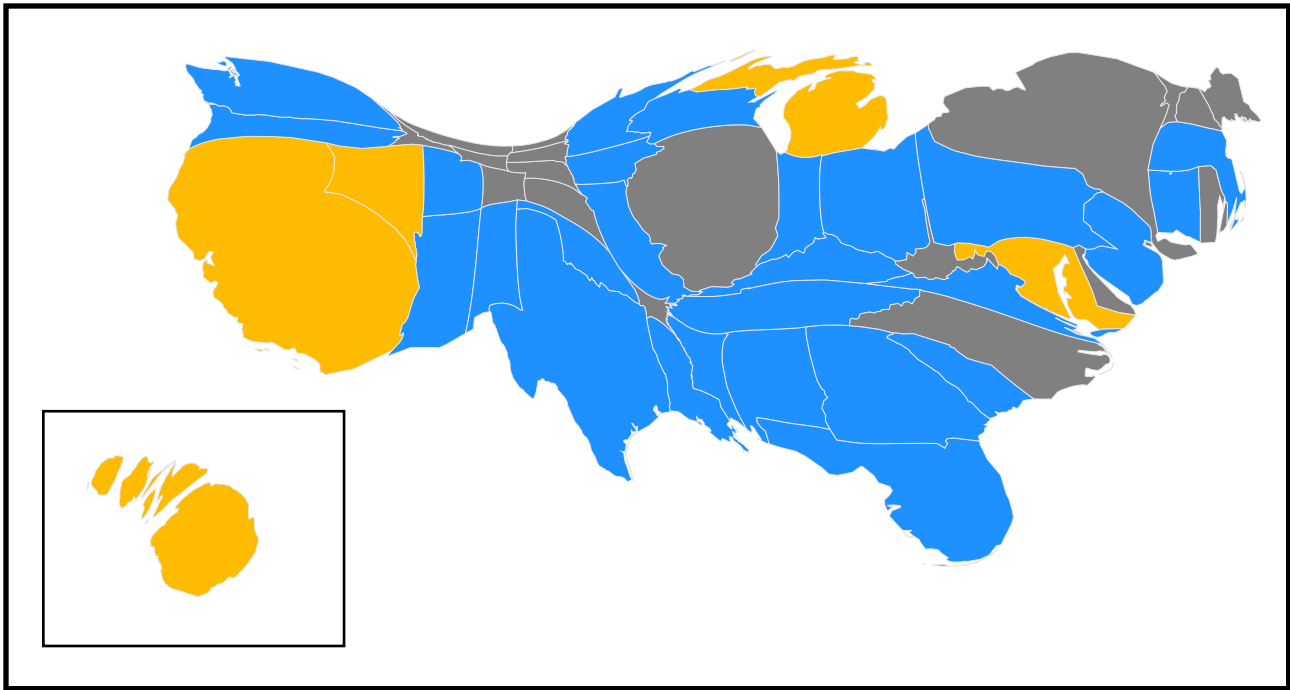

 Jessica

 Phillip

 CC
